# Supplementary material for: Clemastine improves electrophysiologic and histomorphometric changes through promoting myelin repair in a murine model of compression neuropathy
Source: PubMed Central journal article supplement (PMC8536687; doi:10.1038/s41598-021-00389-1), 2021-10-22
Supplement: 41598_2021_389_MOESM1_ESM.pdf [file 41598_2021_389_MOESM1_ESM.pdf]

**Supplementary Information**

**Clemastine improves electrophysiologic and histomorphometric changes through promoting myelin repair in a murine model of compression neuropathy**

Jung Il Lee, M.D., Ph.D, Jong Woong Park, M.D, Ph.D, Kyung Jun Lee, B.S, Duk Hee Lee, M.D., Ph.D

A

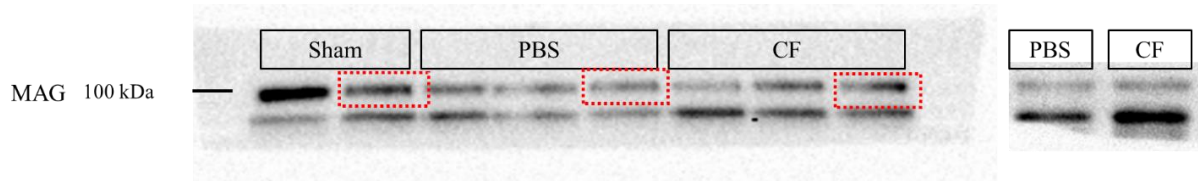

B

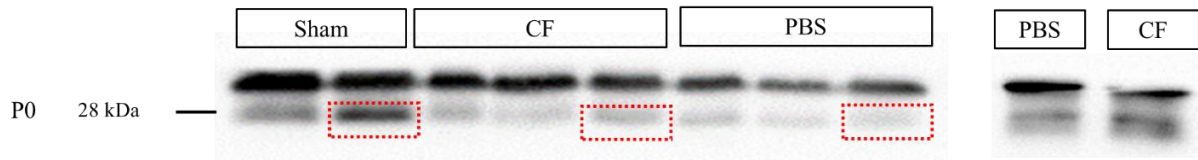

C

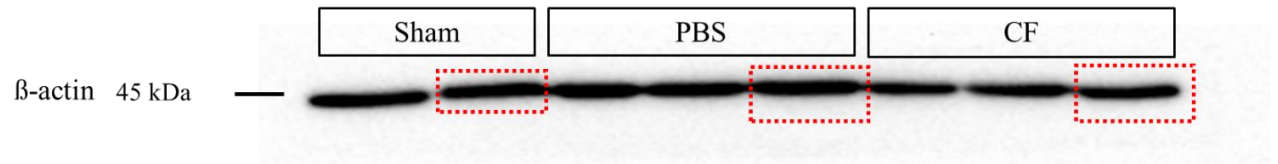

**Supplementary Figure 1.** Uncropped Western blot images displayed in compression phase of Figure 4 for expression of: myelin associated glycoprotein (MAG) (A); myelin protein 0 (P0) (B);  $\beta$ -actin (C). The dotted rectangles delineate the areas shown in Fig. 4.

A

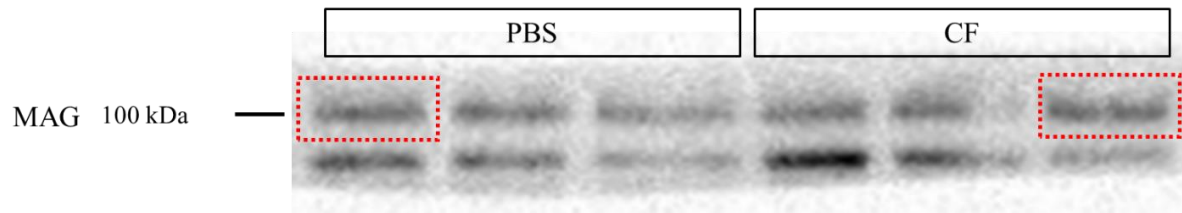

B

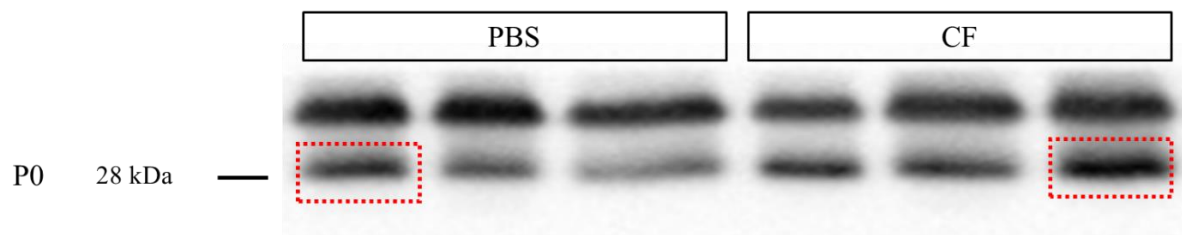

C

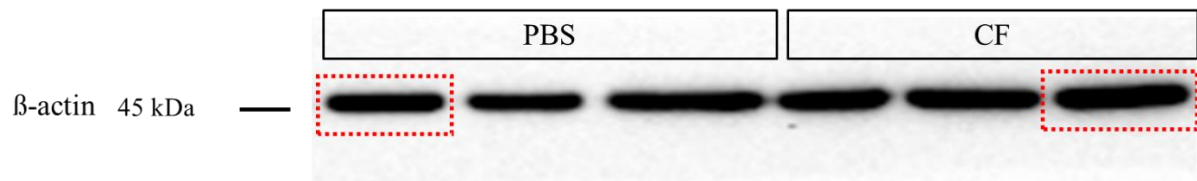

Supplementary Figure 2. Uncropped Western blot images displayed in decompression phase of Figure 4 for expression of: myelin associated glycoprotein (MAG) (A); myelin protein 0 (P0) (B);  $\beta$ -actin (C). The dotted rectangles delineate the areas shown in Fig. 4.
